# Supplementary material for: Mycoplasma pneumoniae detections before and during the COVID-19 pandemic: results of a global survey, 2017 to 2021
Source: PubMed Central journal article supplement (PMC9101966; doi:10.2807/1560-7917.es.2022.27.19.2100746), 2022-05-12

## **Supplementary material**

This supplementary material is hosted by *Eurosurveillance* as supporting information alongside the article [*Mycoplasma pneumoniae* detections before and during the COVID-19 pandemic: results of a global survey, 2017–2021], on behalf of the authors, who remain responsible for the accuracy and appropriateness of the content. The same standards for ethics, copyright, attributions, and permissions as for the article apply. Supplements are not edited by *Eurosurveillance* and the journal is not responsible for the maintenance of any links or email addresses provided therein.

## Tables

### Supplementary Table S1. Details of the survey.

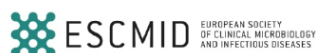

MyCOVID ESGMAC survey

Survey

#### ***Mycoplasma pneumoniae* prevalence before and during the COVID-19 pandemic: the MyCOVID survey on behalf of the ESGMAC**

##### Overview of the survey:

- 1) Details of the survey participant
- 2) Information on laboratory and area
- 3) Local COVID-19 information
- 4) Information on test method for *Mycoplasma pneumoniae* detection
- 5) *Mycoplasma pneumoniae* test numbers
- 6) *Mycoplasma pneumoniae* macrolide resistance

##### General information:

- Please collect data about *Mycoplasma pneumoniae* detection and test numbers before entering the survey.
- The completion of the survey takes **20 min** (if data are on hand).
- There is no need to answer all of the questions. Please enter "NA" (not applicable) if no data / information exists.
- You will be able to revisit the survey to check and adjust your answers.
- It is also possible to send data / information via e-mail to [patrick.meyer@kispi.uzh.ch](mailto:patrick.meyer@kispi.uzh.ch) and we will complete the survey for you.

#### 1) Details of the survey participant

|                                                                                                                       |     |    |
|-----------------------------------------------------------------------------------------------------------------------|-----|----|
| Last name                                                                                                             |     |    |
| First name                                                                                                            |     |    |
| Academic title                                                                                                        |     |    |
| Profession                                                                                                            |     |    |
| Affiliation                                                                                                           |     |    |
| E-Mail                                                                                                                |     |    |
| Consent to publish the data by the ESGMAC                                                                             | Yes | No |
| Consent to be listed as survey participant with name and affiliation in the acknowledgment section of the publication | Yes | No |
| Ethical approval for data submission required according to local regulations                                          | Yes | No |
| If yes, please add ethics committee and project number (if available)                                                 |     |    |

#### 2) Information on laboratory and area

|                                                                           |                                |                      |                     |
|---------------------------------------------------------------------------|--------------------------------|----------------------|---------------------|
| Type of laboratory / system                                               | Hospital / clinical laboratory | Reference laboratory | Surveillance system |
| Name of laboratory / system                                               |                                |                      |                     |
| Link (URL) to the laboratory / system                                     |                                |                      |                     |
| If hospital / clinical laboratory, please add type of affiliated hospital | Primary                        | Secondary            | Tertiary            |
| City and post / zip code                                                  | City:                          | Post / zip code:     |                     |
| Country                                                                   |                                |                      |                     |
| Comments                                                                  |                                |                      |                     |

**3) Local COVID-19 information**

|                                                                                                                                                                                                              |         |           |
|--------------------------------------------------------------------------------------------------------------------------------------------------------------------------------------------------------------|---------|-----------|
| Please approve dates for your national pandemic lockdowns at <a href="https://en.wikipedia.org/wiki/COVID-19_lockdowns">https://en.wikipedia.org/wiki/COVID-19_lockdowns</a> ("Table of pandemic lockdowns") | Correct | Incorrect |
| If incorrect, please add information                                                                                                                                                                         |         |           |
| School closure duration in months from 01.04.2020–31.03.2021                                                                                                                                                 |         |           |

**4) Information on test method for *Mycoplasma pneumoniae* detection**

|                                                |                            |                   |          |       |
|------------------------------------------------|----------------------------|-------------------|----------|-------|
| Method                                         | Nucleic acid amplification | Antigen detection | Serology | Other |
| Technique (e.g., multiplex PCR)                |                            |                   |          |       |
| Detection (e.g., microarray)                   |                            |                   |          |       |
| Product (e.g., FilmArray Respiratory Panel)    |                            |                   |          |       |
| Company (e.g., bioMérieux/Biofire Diagnostics) |                            |                   |          |       |
| Literature reference (if available)            |                            |                   |          |       |
| Comments                                       |                            |                   |          |       |

**5) *Mycoplasma pneumoniae* test numbers**

|                                         |                        |      |      |      |      |      |                     |      |      |      |      |      |
|-----------------------------------------|------------------------|------|------|------|------|------|---------------------|------|------|------|------|------|
| <b>01.04.2020–31.03.2021 (pandemic)</b> | <b>Positive tests:</b> |      |      |      |      |      | <b>Total tests:</b> |      |      |      |      |      |
| – Children (<18 years)                  | Positive tests:        |      |      |      |      |      | Total tests:        |      |      |      |      |      |
| – Sex (female)                          | Positive tests:        |      |      |      |      |      | Total tests:        |      |      |      |      |      |
| – Positive tests by month               | Apr:                   | May: | Jun: | Jul: | Aug: | Sep: | Oct:                | Nov: | Dec: | Jan: | Feb: | Mar: |
| Comments                                |                        |      |      |      |      |      |                     |      |      |      |      |      |

|                              |                        |      |      |      |      |      |                     |      |      |      |      |      |
|------------------------------|------------------------|------|------|------|------|------|---------------------|------|------|------|------|------|
| <b>01.04.2019–31.03.2020</b> | <b>Positive tests:</b> |      |      |      |      |      | <b>Total tests:</b> |      |      |      |      |      |
| – Children (<18 years)       | Positive tests:        |      |      |      |      |      | Total tests:        |      |      |      |      |      |
| – Sex (female)               | Positive tests:        |      |      |      |      |      | Total tests:        |      |      |      |      |      |
| – Positive tests by month    | Apr:                   | May: | Jun: | Jul: | Aug: | Sep: | Oct:                | Nov: | Dec: | Jan: | Feb: | Mar: |
| Comments                     |                        |      |      |      |      |      |                     |      |      |      |      |      |

|                              |                        |      |      |      |      |      |                     |      |      |      |      |      |
|------------------------------|------------------------|------|------|------|------|------|---------------------|------|------|------|------|------|
| <b>01.04.2018–31.03.2019</b> | <b>Positive tests:</b> |      |      |      |      |      | <b>Total tests:</b> |      |      |      |      |      |
| – Children (<18 years)       | Positive tests:        |      |      |      |      |      | Total tests:        |      |      |      |      |      |
| – Sex (female)               | Positive tests:        |      |      |      |      |      | Total tests:        |      |      |      |      |      |
| – Positive tests by month    | Apr:                   | May: | Jun: | Jul: | Aug: | Sep: | Oct:                | Nov: | Dec: | Jan: | Feb: | Mar: |
| Comments                     |                        |      |      |      |      |      |                     |      |      |      |      |      |

|                              |                        |      |      |      |      |      |                     |      |      |      |      |      |
|------------------------------|------------------------|------|------|------|------|------|---------------------|------|------|------|------|------|
| <b>01.04.2017–31.03.2018</b> | <b>Positive tests:</b> |      |      |      |      |      | <b>Total tests:</b> |      |      |      |      |      |
| – Children (<18 years)       | Positive tests:        |      |      |      |      |      | Total tests:        |      |      |      |      |      |
| – Sex (female)               | Positive tests:        |      |      |      |      |      | Total tests:        |      |      |      |      |      |
| – Positive tests by month    | Apr:                   | May: | Jun: | Jul: | Aug: | Sep: | Oct:                | Nov: | Dec: | Jan: | Feb: | Mar: |
| Comments                     |                        |      |      |      |      |      |                     |      |      |      |      |      |

**6) *Mycoplasma pneumoniae* macrolide resistance**

|                                         |                                 |                                   |
|-----------------------------------------|---------------------------------|-----------------------------------|
| Method                                  |                                 |                                   |
| <b>01.04.2020–31.03.2021 (pandemic)</b> | Macrolide resistance detection: | Testing for macrolide resistance: |
| <b>01.04.2019–31.03.2020</b>            | Macrolide resistance detection: | Testing for macrolide resistance: |
| <b>01.04.2018–31.03.2019</b>            | Macrolide resistance detection: | Testing for macrolide resistance: |
| <b>01.04.2017–31.03.2018</b>            | Macrolide resistance detection: | Testing for macrolide resistance: |
| Comments                                |                                 |                                   |

**Supplementary Table S2.** Reporting characteristics, de-duplication and exclusion criteria by participating sites.

| UN region and country | City or region | Laboratory affiliation                                                                                                                         | Ethical approval for data submission required according to local regulations | De-duplication                                                                                                                                                                                                                                                              | Exclusion                                                    |
|-----------------------|----------------|------------------------------------------------------------------------------------------------------------------------------------------------|------------------------------------------------------------------------------|-----------------------------------------------------------------------------------------------------------------------------------------------------------------------------------------------------------------------------------------------------------------------------|--------------------------------------------------------------|
| <b>Europe</b>         |                |                                                                                                                                                |                                                                              |                                                                                                                                                                                                                                                                             |                                                              |
| <b>Western Europe</b> |                |                                                                                                                                                |                                                                              |                                                                                                                                                                                                                                                                             |                                                              |
| - France              | Bordeaux       | Laboratory of Bacteriology, Pellegrin Hospital, Bordeaux, France                                                                               | No**                                                                         | All the numbers provided are from episodes of patients being tested. This means that if a patient has been tested more than once within 90 days, only the first positive or, when the patient only tested negative, the first negative test has been retained for analysis. | None given                                                   |
| - Switzerland         | Geneva         | Bacteriology Laboratory, Division of Laboratory Medicine, Department of Diagnostics, Geneva University Hospitals, Geneva, Switzerland          | No**                                                                         | None given                                                                                                                                                                                                                                                                  | None given                                                   |
|                       | Lausanne       | Clinique de La Source - Laboratories, Lausanne, Switzerland                                                                                    | No**                                                                         | None given                                                                                                                                                                                                                                                                  | None given                                                   |
|                       | Bern*          | Institute for Infectious Diseases, University of Bern, Bern, Switzerland.                                                                      | No**                                                                         | None given                                                                                                                                                                                                                                                                  | None given                                                   |
|                       | Lucerne*       | Department of Laboratory Medicine, Cantonal Hospital Lucerne, Switzerland                                                                      | No**                                                                         | None given                                                                                                                                                                                                                                                                  | No total test number available for 2017-04-01 to 2018-03-31. |
|                       | Bellinzona     | Department of Microbiology, Bellinzona, Switzerland                                                                                            | No**                                                                         | None given                                                                                                                                                                                                                                                                  | None given                                                   |
|                       | Zurich (A)     | Institute of Medical Microbiology, University of Zurich, Zurich, Switzerland                                                                   | No**                                                                         | None given                                                                                                                                                                                                                                                                  | None given                                                   |
|                       | Zurich (B)*    | Microbiology Laboratory, Division of Infectious Diseases and Hospital Epidemiology, University Children's Hospital Zurich, Zurich, Switzerland | No**                                                                         | All the numbers provided are from episodes of patients being tested. This means that if a patient has been tested more than once within 90 days, only the first positive or, when the patient only tested negative, the first negative test has been retained for analysis. | None given                                                   |
|                       | St. Gallen*    | Center for Laboratory Medicine, St Gallen, Switzerland                                                                                         | No**                                                                         | None given                                                                                                                                                                                                                                                                  | None given                                                   |
|                       | Aarau          | Department of Clinical Microbiology, Institute of Laboratory Medicine, Kantonsspital Aarau, Aarau, Switzerland                                 | No**                                                                         | None given                                                                                                                                                                                                                                                                  | None given                                                   |
|                       | Basel (A)      | Clinical Bacteriology and Mycology, University Hospital Basel, Basel, Switzerland                                                              | No**                                                                         | None given                                                                                                                                                                                                                                                                  | None given                                                   |
|                       | Basel (B)*     | Department of Infectious Diseases and Vaccinology, University of Basel Children's Hospital, Basel, Switzerland                                 | No**                                                                         | None given                                                                                                                                                                                                                                                                  | None given                                                   |
| - Germany             | Homburg        | Center for Infectious Diseases, Institute of Medical Microbiology and Hygiene, Saarland University, Homburg, Germany                           | No**                                                                         | None given                                                                                                                                                                                                                                                                  | None given                                                   |
|                       | Düsseldorf     | Institute for Medical Microbiology and Hospital Hygiene, Heinrich Heine University Düsseldorf, Düsseldorf, Germany                             | No**                                                                         | None given                                                                                                                                                                                                                                                                  | None given                                                   |
|                       | Saxony         | Landesuntersuchungsanstalt Sachsen, Dresden, Germany                                                                                           | No**                                                                         | None given                                                                                                                                                                                                                                                                  | No total test numbers available and/or reported.             |

Supplementary material

|                        |                                                 |                                                                                                                                                                                                                                   |                       |                                                                                                                                                                                                                                                                             |                                                                                                                                                                                                                                                                                  |
|------------------------|-------------------------------------------------|-----------------------------------------------------------------------------------------------------------------------------------------------------------------------------------------------------------------------------------|-----------------------|-----------------------------------------------------------------------------------------------------------------------------------------------------------------------------------------------------------------------------------------------------------------------------|----------------------------------------------------------------------------------------------------------------------------------------------------------------------------------------------------------------------------------------------------------------------------------|
| - Belgium              | Antwerp, Leuven (national reference laboratory) | National reference laboratory, Universitair Ziekenhuis Antwerpen and UZ Leuven/KU Leuven, Belgium                                                                                                                                 | No**                  | All the numbers provided are from episodes of patients being tested. This means that if a patient has been tested more than once within 90 days, only the first positive or, when the patient only tested negative, the first negative test has been retained for analysis. | None given                                                                                                                                                                                                                                                                       |
|                        | National surveillance                           | Additional data analysis by the national public health institute Sciensano, Brussels, Belgium<br>Belgian Sentinel Network of Laboratories (SNL), coordinated by the national public health institute Sciensano, Brussels, Belgium | No**                  | All the numbers provided are from episodes of patients being tested. This means that if a patient has been tested more than once within 90 days, only the first positive or, when the patient only tested negative, the first negative test has been retained for analysis. | The data of the SNL include "Mycoplasma-like illness" syndromes cases confirmed by direct detection in nasopharyngeal or oropharyngeal swabs, or lower respiratory tract specimens. Cases based on serology have been excluded. No total test numbers available and/or reported. |
| - The Netherlands      | Rotterdam                                       | Medical Microbiology and Infectious Diseases, Erasmus Medical Center, Rotterdam, The Netherlands                                                                                                                                  | No**                  | None given                                                                                                                                                                                                                                                                  | No test and detection numbers available for 2017-04-01 to 2018-03-31.                                                                                                                                                                                                            |
| <b>Northern Europe</b> |                                                 |                                                                                                                                                                                                                                   |                       |                                                                                                                                                                                                                                                                             |                                                                                                                                                                                                                                                                                  |
| - England              | National reference laboratory                   | Bacteriology reference department (BRD), Public Health England, London, England, United Kingdom                                                                                                                                   | No**                  | Duplicates have been removed in each period (April 1 – March 30). Duplicate samples across the four periods were classified as separate episodes. The first sample of duplicates was retained. Internal and external quality assessment samples.                            | None given                                                                                                                                                                                                                                                                       |
| - Denmark              | National surveillance                           | The Danish Microbiology Database (MiBa)                                                                                                                                                                                           | Yes (available)       | At individual level only the first mycoplasma positive test result within a season is included. If several negative mycoplasma tests are available per individual, only one negative mycoplasma test is included/counted per week.                                          | The first time an individual test positive for mycoplasma all subsequent negative and positive mycoplasma tests are excluded.                                                                                                                                                    |
| - Finland              | Turku                                           | Department of Clinical Microbiology, Turku University Hospital, Turku, Finland                                                                                                                                                    | No**                  | None given                                                                                                                                                                                                                                                                  | None given                                                                                                                                                                                                                                                                       |
|                        | National surveillance                           | National Infectious Disease Register (IDR) maintained by the Finnish National Institute for Health and Welfare (THL)                                                                                                              | No**                  | None given                                                                                                                                                                                                                                                                  | No total test numbers available and/or reported.                                                                                                                                                                                                                                 |
| - Norway               | Trondheim                                       | Department of Medical Microbiology, St. Olavs Hospital, Trondheim University Hospital, Trondheim, Norway                                                                                                                          | Yes (available)       | None given                                                                                                                                                                                                                                                                  | None given                                                                                                                                                                                                                                                                       |
| <b>Southern Europe</b> |                                                 |                                                                                                                                                                                                                                   |                       |                                                                                                                                                                                                                                                                             |                                                                                                                                                                                                                                                                                  |
| - Portugal             | Coimbra*                                        | Hospital Pediátrico, Centro Hospitalar e Universitário de Coimbra, Coimbra, Portugal                                                                                                                                              | Yes (available)       | None given                                                                                                                                                                                                                                                                  | None given                                                                                                                                                                                                                                                                       |
| - Greece               | Athens (A)*                                     | Department of Microbiology & Serology, P. & A. Kyriakou Children's Hospital, Athens, Greece                                                                                                                                       | No**                  | None given                                                                                                                                                                                                                                                                  | None given                                                                                                                                                                                                                                                                       |
|                        | Athens (B)*                                     | Microbiology Department, "Agia Sofia" Children's Hospital, Athens, Greece                                                                                                                                                         | No**                  | None given                                                                                                                                                                                                                                                                  | None given                                                                                                                                                                                                                                                                       |
| - Slovenia             | Ljubljana                                       | Institute of Microbiology and Immunology, Faculty of Medicine, University of Ljubljana, Ljubljana, Slovenia                                                                                                                       | Yes (0120-244/2021/3) | Duplicate samples from the same patients were included as a single case.                                                                                                                                                                                                    | Serological data excluded.                                                                                                                                                                                                                                                       |
| <b>Asia</b>            |                                                 |                                                                                                                                                                                                                                   |                       |                                                                                                                                                                                                                                                                             |                                                                                                                                                                                                                                                                                  |
| <b>Western Asia</b>    |                                                 |                                                                                                                                                                                                                                   |                       |                                                                                                                                                                                                                                                                             |                                                                                                                                                                                                                                                                                  |
| - Israel               | Jerusalem                                       | Department of Clinical Microbiology and Infectious Diseases, Hadassah Hebrew University Medical Center, Jerusalem, Israel                                                                                                         | Yes (HMO 460-12)      | None given                                                                                                                                                                                                                                                                  | None given                                                                                                                                                                                                                                                                       |
| <b>Eastern Asia</b>    |                                                 |                                                                                                                                                                                                                                   |                       |                                                                                                                                                                                                                                                                             |                                                                                                                                                                                                                                                                                  |
| - Japan                | Kurashiki City (Okayama)*                       | Kawasaki Medical School, Kurashiki-City, Okayama, Japan                                                                                                                                                                           | Yes (3119-1)          | None given                                                                                                                                                                                                                                                                  | None given                                                                                                                                                                                                                                                                       |
|                        | Tokyo <sup>1</sup>                              | Eiju General Hospital, Tokyo, Japan                                                                                                                                                                                               | Yes (2015-8)          | None given                                                                                                                                                                                                                                                                  | No positive test numbers reported by month.                                                                                                                                                                                                                                      |
| - Taiwan               | Taoyuan*                                        | Chang Gung Memorial Hospital, Taoyuan, Taiwan                                                                                                                                                                                     | Yes (201900420A3C502) | None given                                                                                                                                                                                                                                                                  | None given                                                                                                                                                                                                                                                                       |

Supplementary material

|                                          |                       |                                                                                                                                                        |                 |                                                                                                                                                                                                                                 |            |
|------------------------------------------|-----------------------|--------------------------------------------------------------------------------------------------------------------------------------------------------|-----------------|---------------------------------------------------------------------------------------------------------------------------------------------------------------------------------------------------------------------------------|------------|
| <b>South-eastern Asia</b><br>- Singapore | Singapore*            | Department of Pathology and Laboratory Medicine, KK Women's and Children's Hospital, Singapore                                                         | No**            | None given                                                                                                                                                                                                                      | None given |
| <b>South Asia</b><br>- India             | New Delhi             | Special Bacterial Pathogen Laboratory, Department of Microbiology, All India Institute of Medical Sciences, New Delhi, India                           | Yes (available) | None given                                                                                                                                                                                                                      | None given |
| <b>America</b>                           |                       |                                                                                                                                                        |                 |                                                                                                                                                                                                                                 |            |
| <b>Northern America</b><br>- USA         | Chicago*              | Ann & Robert H Lurie Children's Hospital of Chicago, Chicago, IL, USA                                                                                  | Yes (available) | None given                                                                                                                                                                                                                      | None given |
| <b>Caribbean</b><br>- Cuba               | National surveillance | National Reference Laboratory of Mycoplasmas, Tropical Medicine Institute "Pedro Kouri", Center for Research, Diagnosis and Reference, La Habana, Cuba | Yes (1901074)   | None given                                                                                                                                                                                                                      | None given |
| <b>Oceania</b>                           |                       |                                                                                                                                                        |                 |                                                                                                                                                                                                                                 |            |
| - Australia                              | Darlinghurst (Sydney) | Division of Microbiology, SydPath St Vincent's Hospital, Sydney, NSW, Australia                                                                        | Yes (available) | None given                                                                                                                                                                                                                      | None given |
| - New Zealand                            | Auckland              | Microbiology Department, LabPlus, Auckland District Health Board, Auckland, New Zealand                                                                | No**            | Positive numbers in April 2020 include 1 patient with 2 positive tests; in October 2019, 2 patients with 2 positive tests; in January 2020, 1 patient with 2 positive tests; and in July 2018, 1 patient with 2 positive tests. | None given |

\* ≥90% of data are from children <18 years of age. \*\* Survey participants confirmed that ethical review and approval is not required for aggregated and anonymized data according to local regulations.

## Figures

**Supplementary Figure S1.** Detection of *M. pneumoniae* in Western Europe by PCR (April 2017–March 2021). Gray backgrounds indicate local stay-at-home order (“lockdown”) periods.

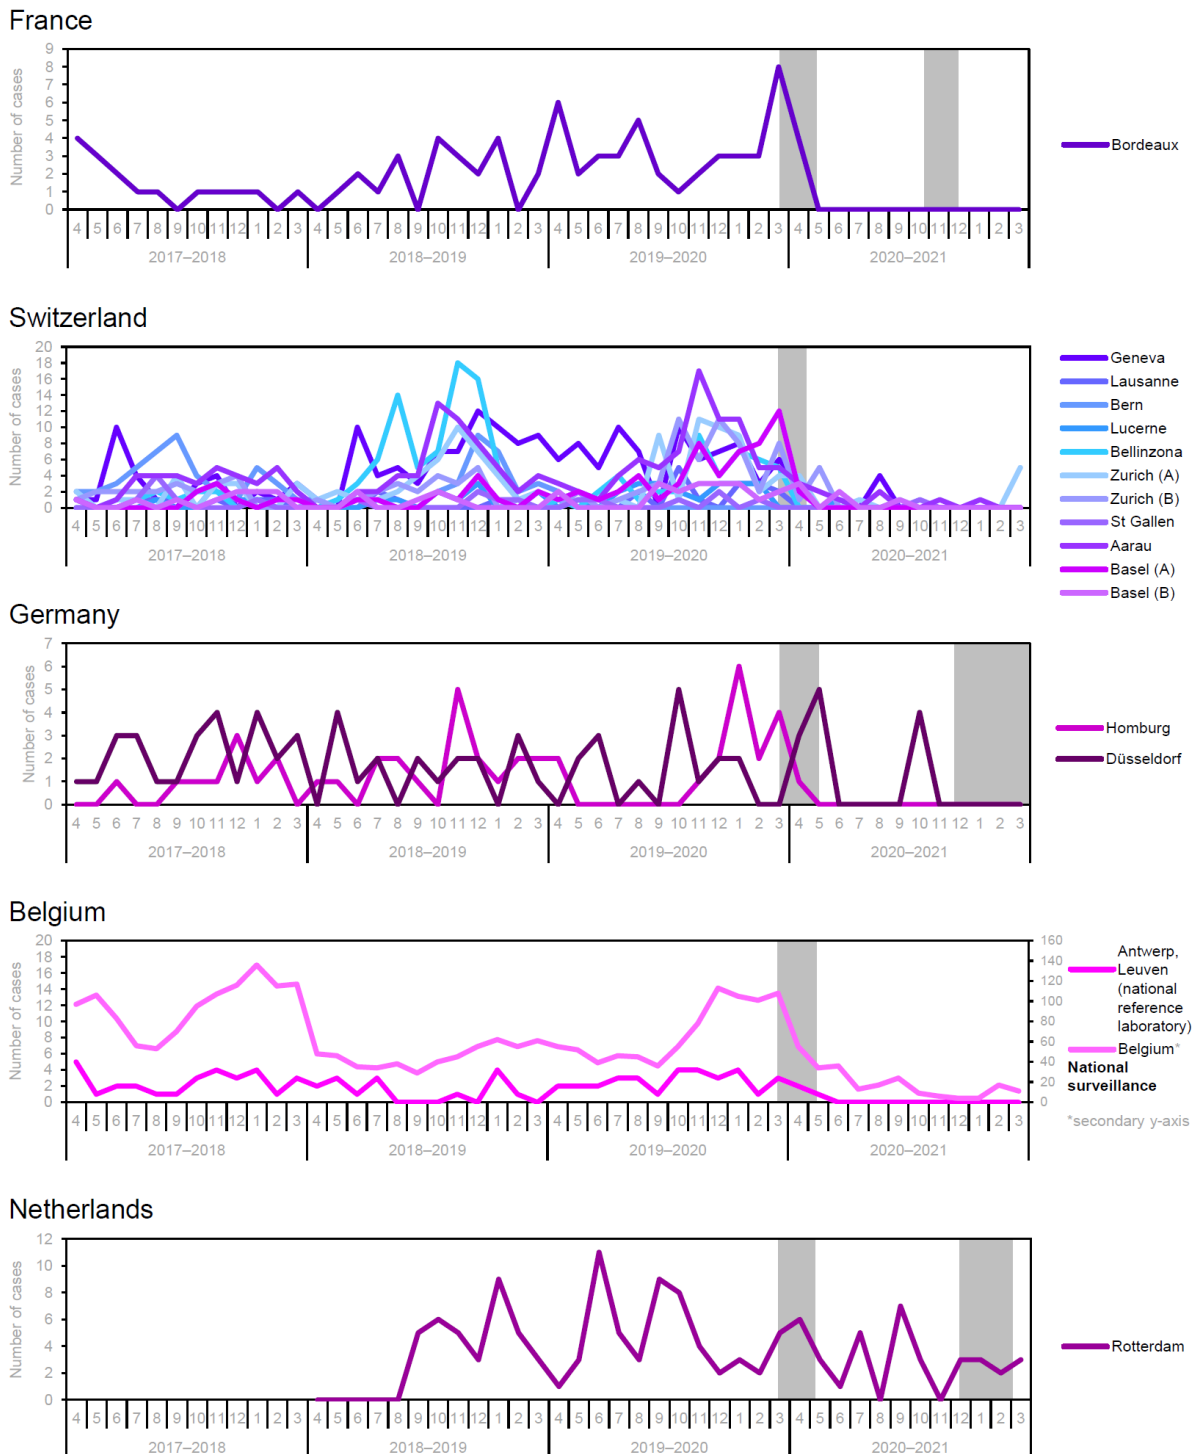

**Supplementary Figure S2.** Detection of *M. pneumoniae* in Northern and Southern Europe by PCR (April 2017–March 2021). Gray backgrounds indicate local stay-at-home order (“lockdown”) periods.

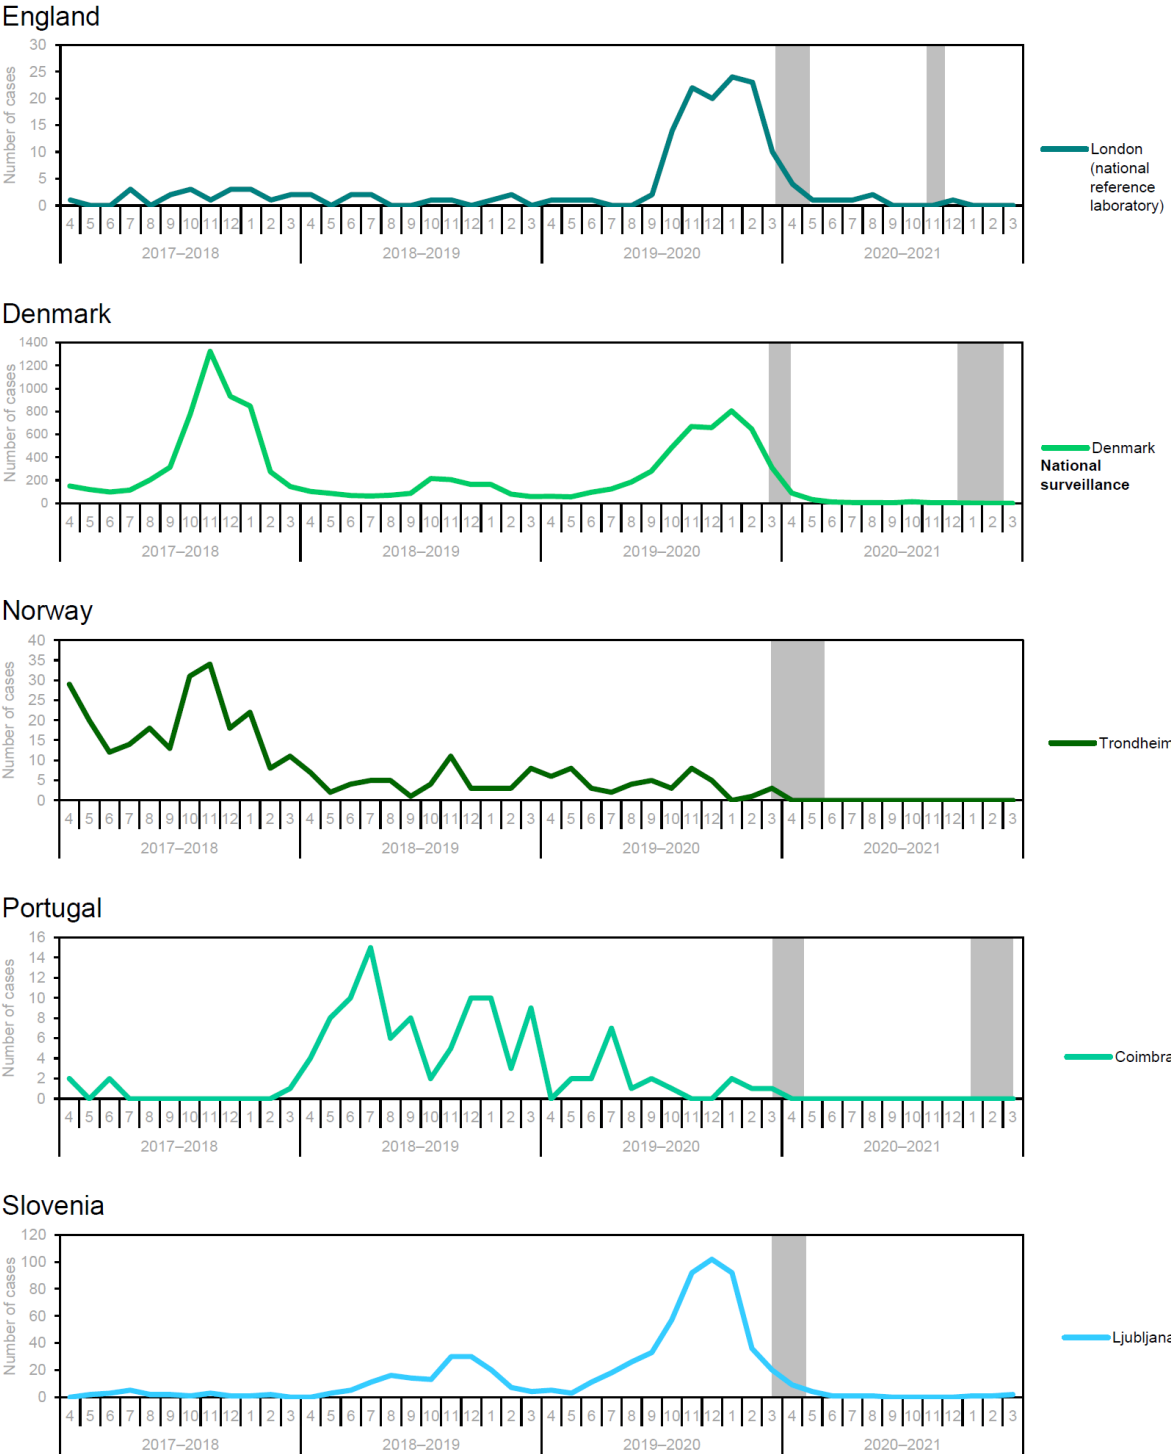



**Supplementary Figure S3.** Detection of *M. pneumoniae* in Asia by PCR (April 2017–March 2021). Gray backgrounds indicate local stay-at-home order (“lockdown”) periods.

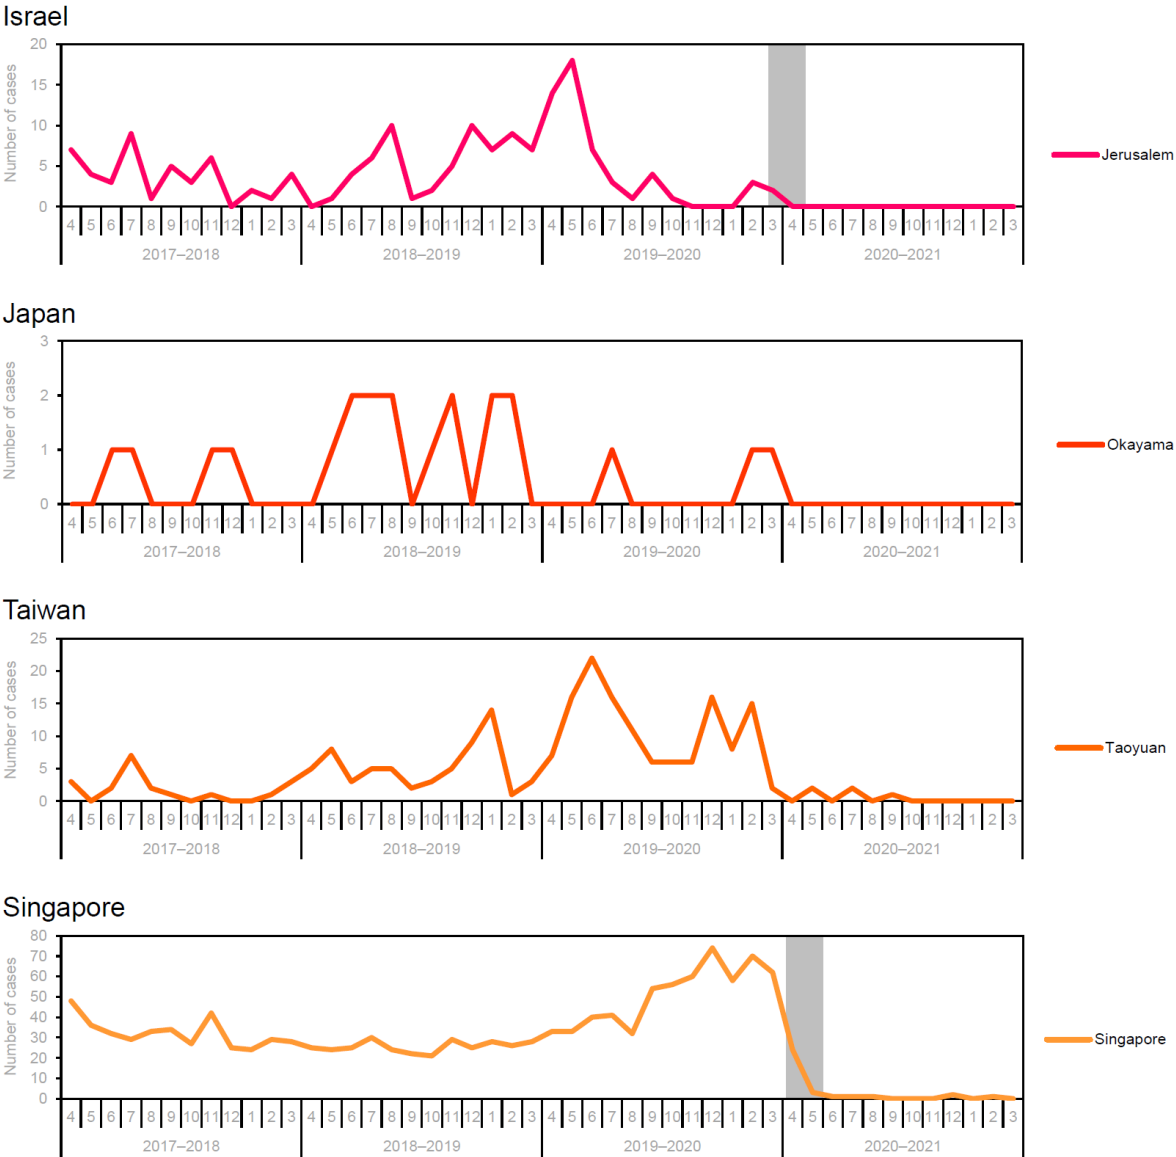

**Supplementary Figure S4.** Detection of *M. pneumoniae* in America and Oceania by PCR (April 2017–March 2021). Gray backgrounds indicate local stay-at-home order (“lockdown”) periods.

United States of America

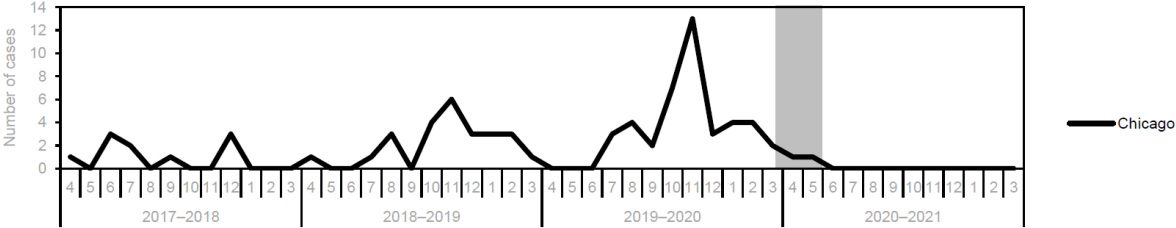

Caribbean

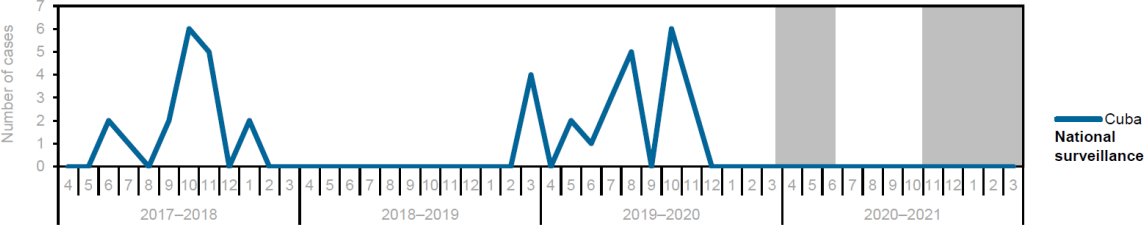

Australia

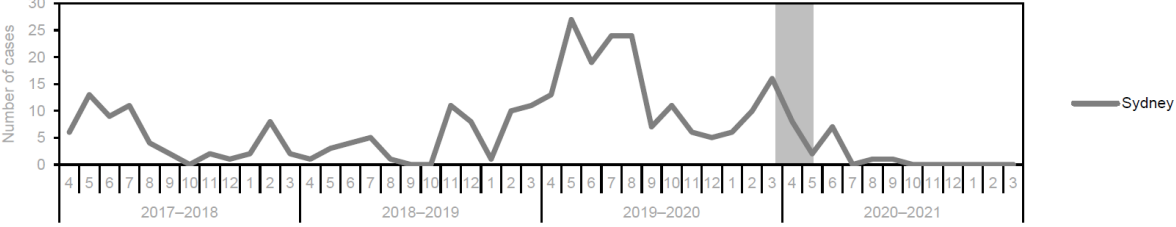

New Zealand

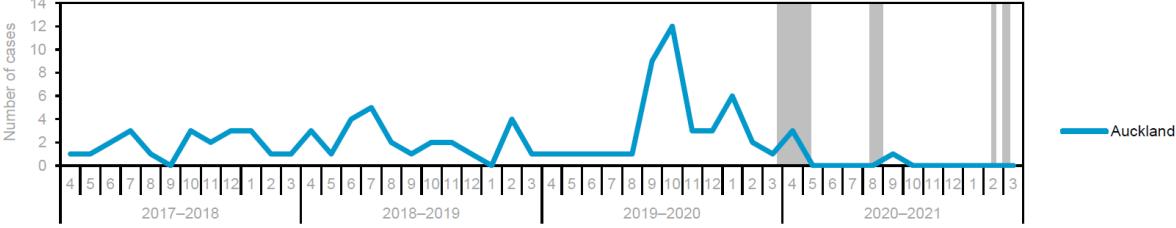

**Supplementary Figure S5.** Detection of *M. pneumoniae* by exclusively serology (April 2017–March 2021). Gray backgrounds indicate local stay-at-home order (“lockdown”) periods. Data from sites which provided serology in addition to PCR are shown in Figure 3.

Greece (Athens, A)

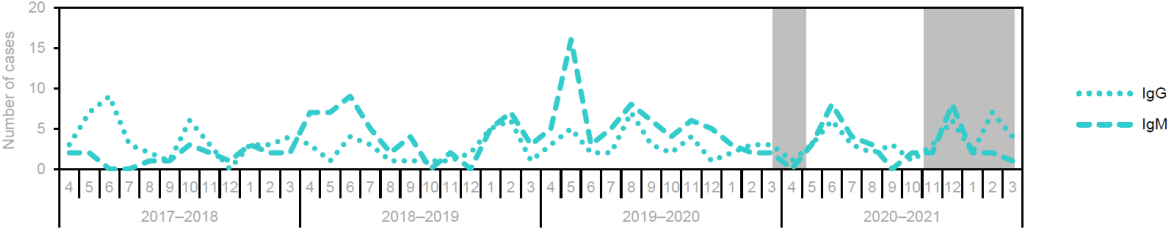

Greece (Athens, B)

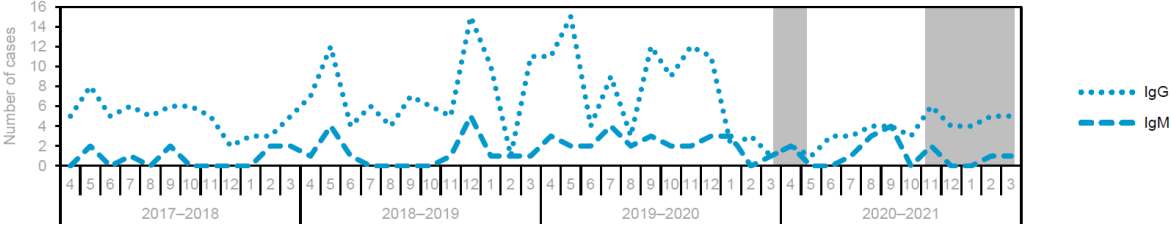

India (New Delhi)

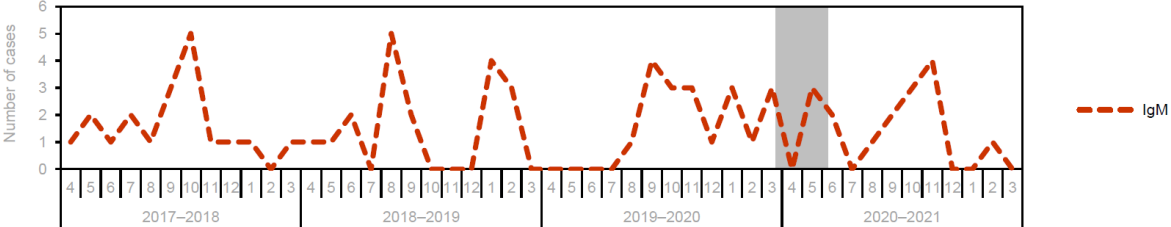

**Supplementary Figure S6.** Detection of *M. pneumoniae* by combination of direct and indirect test methods (no distinction possible between detection methods, but predominantly serology) (April 2017–March 2021). Gray backgrounds indicate local stay-at-home order (“lockdown”) periods.

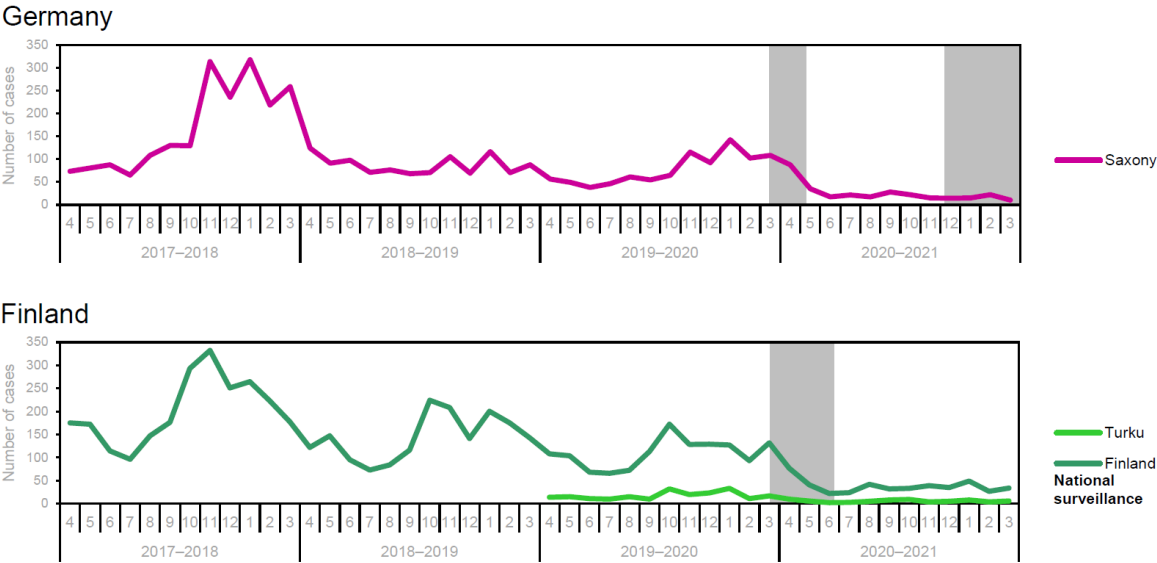

Supplement: 21-00746_MEYER-SAUTEUR_Supplement.pdf [file 21-00746_MEYER-SAUTEUR_Supplement.pdf]
